# Supplementary material
Source: MDPI journal article supplement (https://www.mdpi.com/2071-1050/14/14/8639)
Supplement: s1 [file s1]

#### Supplementary Material S1. Detailed structure of the course plan

1. Online consultation (1st) - 90 min
    - a. Introduction of the course, sharing and discuss videos about the production of homemade tools. Discussing any issues that may arise. - 45 min
    - b. Introducing the equipment. Presentation of the proper basic surgical instruments. Review of household appliances suitable for the replacement of basic surgical instruments. Consultation on the possibilities of the students. - 45 min
  2. Online consultation (2nd) - 60 min
    - a. Discussion of instrument replacement issues or problems and solving them. - 15 min
    - b. Theoretical principles of surgical knotting, sharing and the tutorial video. Joint practice. - 45 min
  3. Independent practice (1st) - at least 30 successful half-knots with both hands, doing both types
  4. Online consultation (3rd) - 60 min
    - a. Discussion of knotting issues and problems - 15 min
    - b. Theoretical principles of interrupted surgical sutures, sharing and discussing the tutorial video. Joint practice. - 45 min
  5. Independent practice (2nd) - at least 30 successful stitches/types
  6. Online consultation (4th) - 60 min
    - a. Discussion of issues related to interrupted surgical sutures - 15 min
    - b. Theoretical principles of running surgical sutures, sharing and discussing the tutorial video. Joint practice. - 45 min
  7. Independent practice (3rd) - at least 30 successful stitches using all types
  8. Online consultation (5th) -60 min
    - a. Discussion of issues related to running surgical sutures - 15 min
    - b. Theoretical principles of intradermal suture and Aberdeen knot, sharing and discussing the tutorial video. Joint practice - 45 min
  9. Independent practice (4th) - at least 30 successful stitches and 30 successful knots
  10. Online consultation (6th)
    - a. Discussion of intradermal suture and Aberdeen knot related issues - 15 min
    - b. Theoretical principles of laparoscopic surgery, sharing and discussing the tutorial video. Joint practice. - 45 min
  11. Independent practice (5th) - successful completion of each task at least 30 times
  12. Online consultation (7th) - Questions from students, joint practice - 30 min
  13. Online exam
-
